# Supplementary material for: Role of Probiotics in Gut Microbiome and Metabolome in Non-Alcoholic Fatty Liver Disease Mouse Model: A Comparative Study
Source: MDPI journal article supplement (doi:10.3390/microorganisms12051020), 2024-05-17
Supplement: s1 [file s1]

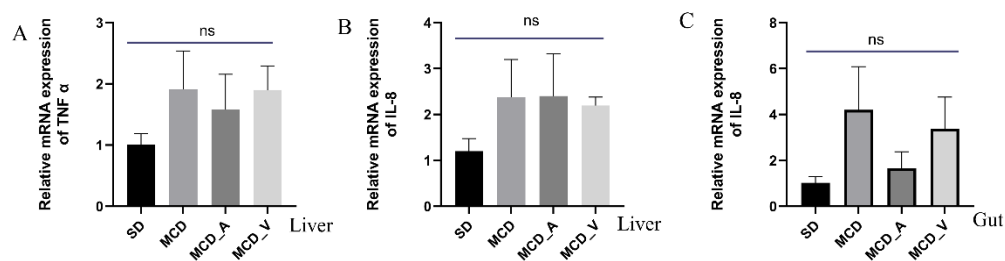

**Supplemental Figure S1.** The expression of TNF- $\alpha$  and IL-8 in livers or gut of mice. The above values are expressed as mean  $\pm$  SD,  $n = 10$ ; ns, no significant difference; \* $p < 0.05$ ; \*\* $p < 0.01$ ; \*\*\* $p < 0.01$ ; \*\*\*\* $p < 0.001$ .

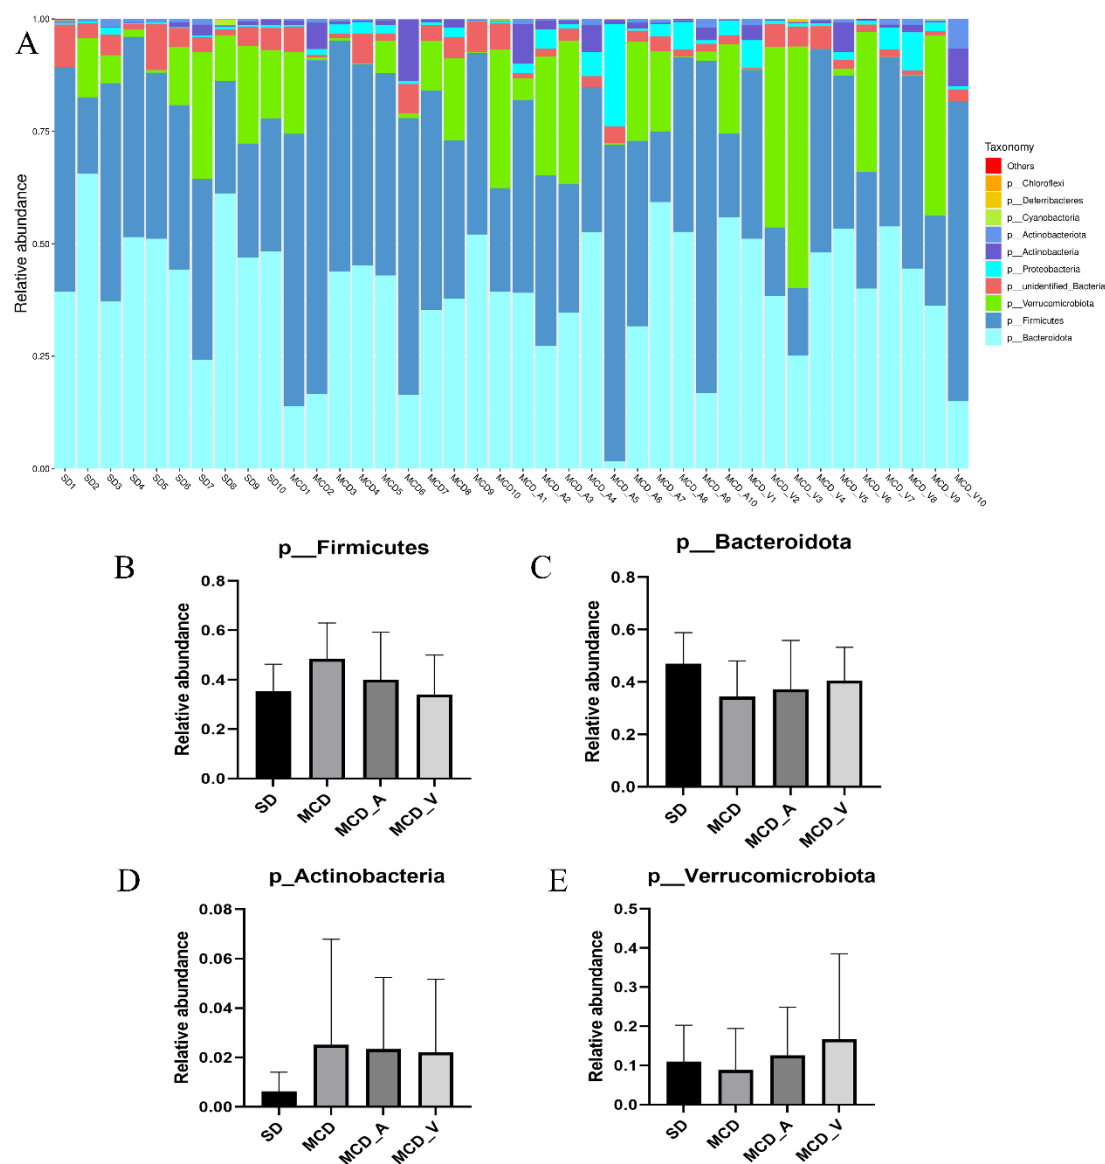

**Supplemental Figure S2.** Relative abundances of dominant bacterial at phylum level. (A). Individual relative abundances of dominant bacterial phylum level; (B)-(E): Relative abundance of Firmicutes, Bacteroidetes, Actinobacteria, and Verrucomicrobiota.

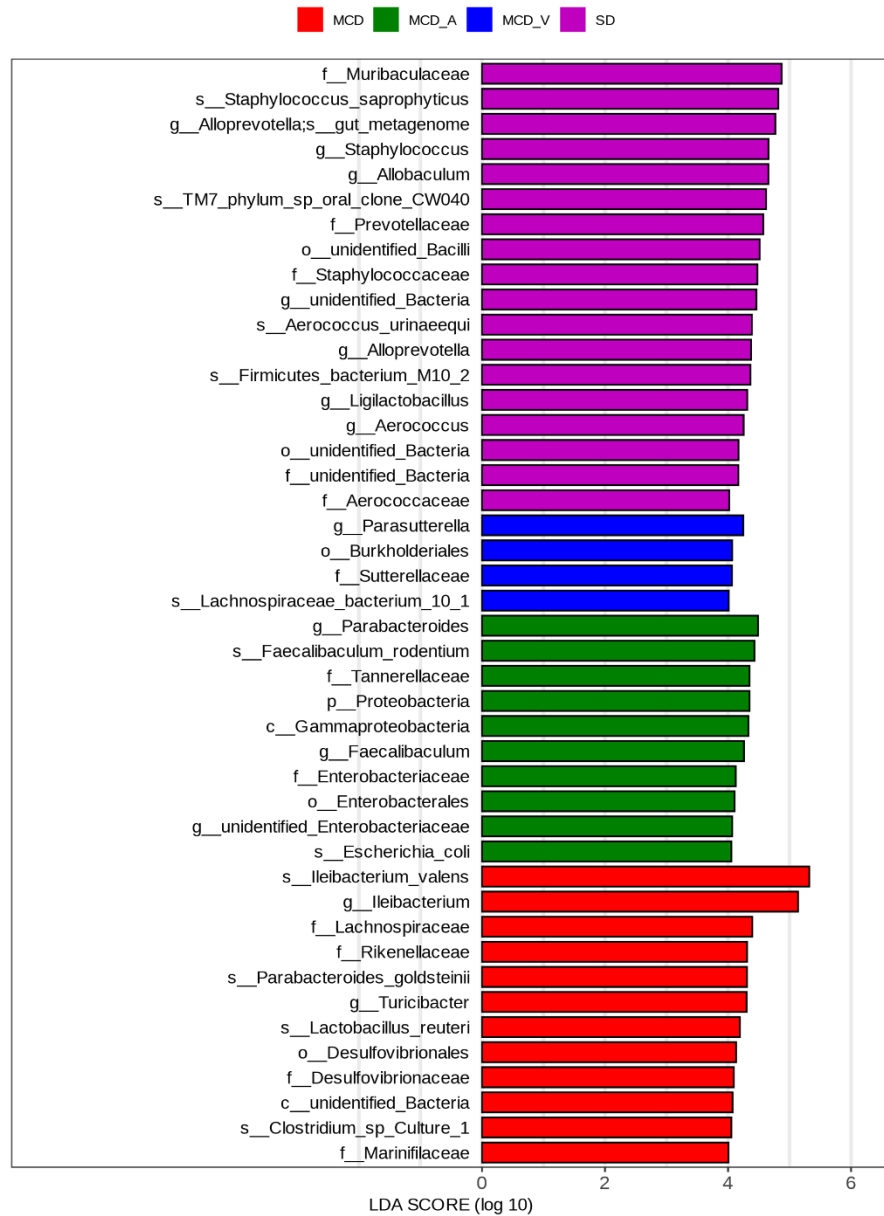

**Supplemental Figure S3.** LEfSe analysis: Histogram showing the LDA scores of genera differentially abundant among the four groups.

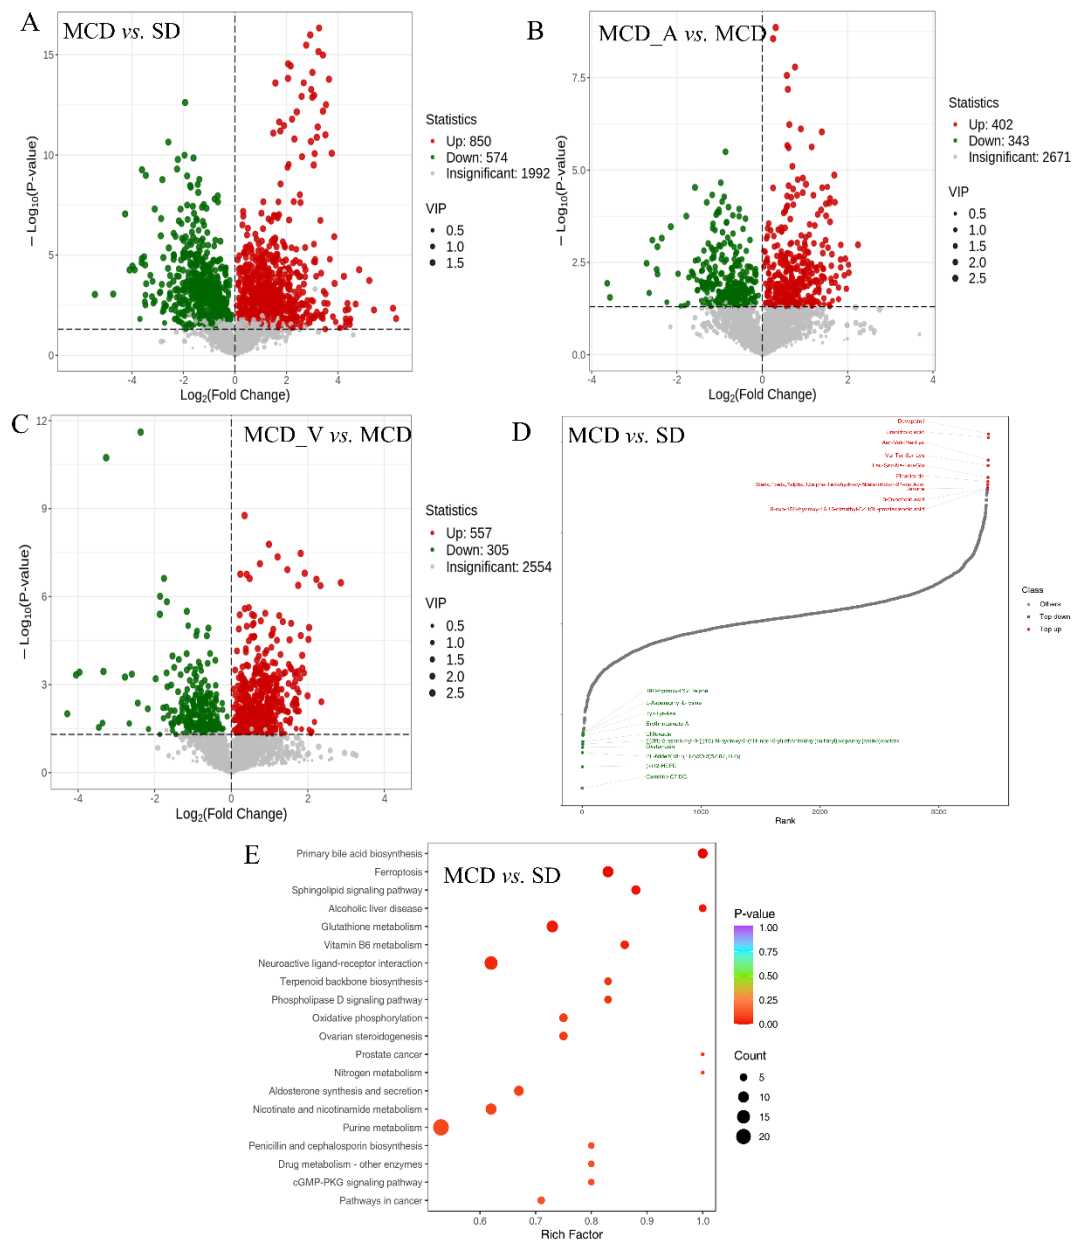

**Supplemental Figure S4.** Metabolic characteristics in four groups. (A)-(C): Volcano plots showing the differential metabolite levels corresponding to the comparison groups, including MCD versus SD, MCD\_A versus MCD, and MCD\_V versus MCD. (D). Dynamic distribution of metabolite content differences (MCD versus SD); (E). Metabolic analysis based on the KEGG database and enriched pathways were displayed by bubble plots (MCD versus SD).
